# Supplementary material for: Carbon dynamics control comtemporary mercury burial in Arctic Ocean sediments
Source: Research Square preprint supplement (doi:10.21203/rs.3.rs-6457403/v1), 2025-04-23

**Table S2. Elemental and isotopic data for North American Arctic Margin sediment cores**

| Region            | Core         | Depth<br>(cm) | Hg<br>(ng g <sup>-1</sup> ) | Organic C<br>(mg g <sup>-1</sup> ) | $\delta^{13}\text{C}$<br>(‰) | Inorganic C<br>(mg g <sup>-1</sup> ) | S <sub>RED</sub> <sup>1</sup><br>(mg g <sup>-1</sup> ) |
|-------------------|--------------|---------------|-----------------------------|------------------------------------|------------------------------|--------------------------------------|--------------------------------------------------------|
| Bering Sea        | SLIP1        | 0,25          | 33,6                        | 16,1                               | -21,9                        | 0,2                                  | 0,10                                                   |
| Bering Sea        | SLIP1        | 0,75          | 32,7                        | 12,5                               | -21,8                        | 1,0                                  |                                                        |
| Bering Sea        | SLIP1        | 1,25          | 30,1                        | 11,4                               |                              | 0,7                                  |                                                        |
| Bering Sea        | SLIP1        | 1,75          | 32,6                        | 10,6                               | -21,7                        | 2,1                                  | 0,17                                                   |
| Bering Sea        | SLIP1        | 2,5           | 31,6                        | 11,2                               |                              | 0,6                                  |                                                        |
| Bering Sea        | SLIP1        | 3,5           | 32,3                        | 10,3                               | -21,5                        | 0,8                                  |                                                        |
| Bering Sea        | SLIP1        | 4,5           | 31,3                        | 10,7                               |                              | 0,4                                  | 0,17                                                   |
| Bering Sea        | SLIP1        | 5,5           | 34,8                        | 10,4                               | -21,5                        | 0,5                                  |                                                        |
| Bering Sea        | SLIP1        | 6,5           | 33,0                        | 10,5                               |                              | 1,0                                  |                                                        |
| Bering Sea        | SLIP1        | 7,5           | 31,2                        | 9,6                                | -21,9                        | 1,2                                  | 0,29                                                   |
| Bering Sea        | SLIP1        | 8,5           | 33,3                        | 10,2                               |                              | 0,1                                  |                                                        |
| Bering Sea        | SLIP1        | 9,5           | 29,3                        | 9,9                                | -21,4                        |                                      |                                                        |
| Bering Sea        | SLIP1        | 11            | 36,5                        | 9,5                                |                              | 0,3                                  | 0,61                                                   |
| Bering Sea        | SLIP1        | 13            | 29,4                        | 9,2                                | -21,7                        | 0,3                                  |                                                        |
| Bering Sea        | SLIP1        | 15            | 30,5                        | 10,1                               |                              | 0,9                                  |                                                        |
| Bering Sea        | SLIP1        | 17            | 30,0                        | 10,6                               | -21,8                        | 0,2                                  | 0,81                                                   |
| Bering Sea        | SLIP1        | 19            | 29,8                        | 9,1                                | -22,4                        | 0,3                                  |                                                        |
| Bering Sea        | SLIP1        | 21,5          | 28,2                        | 9,5                                | -21,9                        | 1,4                                  | 1,16                                                   |
| Bering Sea        | SLIP1        | 24,5          | 28,3                        | 10,2                               |                              | 0,8                                  |                                                        |
| Bering Sea        | SLIP1        | 27,5          | 25,0                        | 8,4                                | -21,4                        | 1,0                                  | 0,97                                                   |
| Bering Sea        | SLIP1        | 30,5          | 29,6                        | 8,8                                |                              | 0,7                                  |                                                        |
| Bering Sea        | SLIP1        | 33,5          | 28,0                        | 7,8                                | -21,4                        |                                      | 2,76                                                   |
| <b>Bering Sea</b> | <b>SLIP3</b> | <b>0,25</b>   | <b>32,0</b>                 | <b>14,9</b>                        | <b>-21,8</b>                 | <b>0,9</b>                           | <b>0,06</b>                                            |
| Bering Sea        | SLIP3        | 0,75          | 36,0                        | 14,4                               | -21,9                        | 0,3                                  |                                                        |
| Bering Sea        | SLIP3        | 1,25          | 33,7                        | 14,5                               |                              |                                      |                                                        |
| Bering Sea        | SLIP3        | 1,75          | 36,9                        | 14,2                               |                              |                                      |                                                        |
| Bering Sea        | SLIP3        | 2,5           | 28,9                        | 12,5                               |                              |                                      | 0,28                                                   |
| Bering Sea        | SLIP3        | 3,5           | 27,7                        | 10,3                               |                              |                                      |                                                        |
| Bering Sea        | SLIP3        | 4,5           | 26,7                        | 10,3                               |                              |                                      |                                                        |
| Bering Sea        | SLIP3        | 5,5           | 27,9                        | 10,6                               |                              |                                      | 0,26                                                   |
| Bering Sea        | SLIP3        | 6,5           | 29,1                        | 11,6                               |                              |                                      |                                                        |
| Bering Sea        | SLIP3        | 7,5           | 28,0                        | 9,5                                |                              |                                      |                                                        |
| Bering Sea        | SLIP3        | 8,5           | 28,1                        | 9,1                                |                              |                                      | 0,43                                                   |
| Bering Sea        | SLIP3        | 9,5           | 25,2                        | 8,7                                |                              |                                      |                                                        |
| Bering Sea        | SLIP3        | 11            | 23,2                        | 7,4                                |                              | 0,7                                  |                                                        |
| Bering Sea        | SLIP3        | 13            | 23,9                        | 8,4                                |                              |                                      | 0,68                                                   |
| Bering Sea        | SLIP3        | 15            | 23,8                        | 9,2                                |                              |                                      |                                                        |
| Bering Sea        | SLIP3        | 17            | 24,7                        | 8,3                                |                              |                                      |                                                        |
| Bering Sea        | SLIP3        | 19            | 26,0                        | 8,1                                |                              |                                      | 0,81                                                   |
| Bering Sea        | SLIP3        | 21,5          | 25,1                        | 8,1                                |                              |                                      |                                                        |
| Bering Sea        | SLIP3        | 24,5          | 23,0                        | 9,7                                |                              |                                      |                                                        |

|                    |              |             |             |             |              |            |             |
|--------------------|--------------|-------------|-------------|-------------|--------------|------------|-------------|
| Bering Sea         | SLIP3        | 27,5        | 22,8        | 7,7         |              | 0,9        |             |
| Bering Sea         | SLIP3        | 30,5        | 23,1        | 7,8         |              |            | 1,60        |
| <b>Bering Sea</b>  | <b>SLIP4</b> | <b>0,25</b> | <b>45,2</b> | <b>19,1</b> | <b>-21,7</b> | <b>0,7</b> | <b>0,20</b> |
| Bering Sea         | SLIP4        | 0,75        | 41,8        | 18,5        | -21,4        | 0,7        |             |
| Bering Sea         | SLIP4        | 1,25        | 38,5        | 17,4        |              |            |             |
| Bering Sea         | SLIP4        | 1,75        | 38,9        | 17,6        |              |            | 0,13        |
| Bering Sea         | SLIP4        | 2,5         | 38,9        | 18,2        |              |            |             |
| Bering Sea         | SLIP4        | 3,5         | 41,1        | 18,3        |              |            |             |
| Bering Sea         | SLIP4        | 4,5         | 47,5        | 18,8        |              |            | 0,80        |
| Bering Sea         | SLIP4        | 5,5         | 41,2        | 17,9        |              |            |             |
| Bering Sea         | SLIP4        | 6,5         | 40,7        | 17,7        |              |            |             |
| Bering Sea         | SLIP4        | 7,5         | 41,0        | 18,0        |              |            | 1,45        |
| Bering Sea         | SLIP4        | 8,5         | 41,6        | 17,1        |              |            |             |
| Bering Sea         | SLIP4        | 9,5         | 38,0        | 17,4        |              |            |             |
| Bering Sea         | SLIP4        | 11          | 40,2        | 16,9        |              | 1,1        | 1,16        |
| Bering Sea         | SLIP4        | 13          | 48,6        | 17,9        |              |            |             |
| Bering Sea         | SLIP4        | 15          | 37,0        | 16,7        |              |            |             |
| Bering Sea         | SLIP4        | 17          | 32,5        | 15,6        |              |            | 1,51        |
| Bering Sea         | SLIP4        | 19          | 33,7        | 14,1        |              |            |             |
| Bering Sea         | SLIP4        | 21,5        | 32,5        | 14,5        |              |            | 1,11        |
| Bering Sea         | SLIP4        | 24,5        | 34,7        | 14,5        |              |            |             |
| Bering Sea         | SLIP4        | 27,5        | 29,4        | 14,5        |              | 0,7        | 1,38        |
| Bering Sea         | SLIP4        | 30,5        | 29,0        | 14,4        |              |            |             |
| Bering Sea         | SLIP4        | 33,5        |             | 13,0        |              |            | 1,98        |
| <b>Chukchi Sea</b> | <b>UTN3</b>  | <b>0,25</b> | <b>30,7</b> | <b>12,5</b> | <b>-20,6</b> | <b>1,5</b> | <b>0,27</b> |
| Chukchi Sea        | UTN3         | 0,75        | 28,0        | 11,1        | -20,6        | 0,8        |             |
| Chukchi Sea        | UTN3         | 1,25        | 29,5        | 11,2        |              |            |             |
| Chukchi Sea        | UTN3         | 1,75        | 29,5        | 9,7         |              |            | 0,26        |
| Chukchi Sea        | UTN3         | 2,5         | 27,3        | 9,6         |              |            |             |
| Chukchi Sea        | UTN3         | 3,5         | 27,2        | 9,1         |              |            |             |
| Chukchi Sea        | UTN3         | 4,5         | 27,9        | 8,8         |              |            | 0,24        |
| Chukchi Sea        | UTN3         | 5,5         | 26,1        | 9,0         |              |            | 0,29        |
| Chukchi Sea        | UTN3         | 6,5         | 27,4        | 9,1         |              |            |             |
| Chukchi Sea        | UTN3         | 7,5         | 25,0        | 8,0         |              | 1,4        | 0,58        |
| Chukchi Sea        | UTN3         | 9           | 22,6        | 6,2         |              |            | 0,83        |
| <b>Chukchi Sea</b> | <b>UTN5</b>  | <b>0,25</b> | <b>31,7</b> | <b>16,2</b> | <b>-21,2</b> | <b>0,8</b> |             |
| Chukchi Sea        | UTN5         | 0,75        | 38,8        | 15,8        | -21,2        | 1,2        | 0,61        |
| Chukchi Sea        | UTN5         | 1,25        | 33,4        | 14,6        |              |            |             |
| Chukchi Sea        | UTN5         | 1,75        | 31,6        | 14,5        |              |            |             |
| Chukchi Sea        | UTN5         | 2,5         | 32,1        | 14,7        |              |            | 0,68        |
| Chukchi Sea        | UTN5         | 3,5         | 34,2        | 14,1        |              |            |             |
| Chukchi Sea        | UTN5         | 4,5         | 33,5        | 13,9        |              |            |             |
| Chukchi Sea        | UTN5         | 5,5         | 33,1        | 12,8        |              |            | 0,72        |
| Chukchi Sea        | UTN5         | 6,5         | 31,5        | 11,8        |              |            |             |
| Chukchi Sea        | UTN5         | 7,5         | 31,2        | 12,2        |              |            |             |
| Chukchi Sea        | UTN5         | 8,5         | 30,2        | 11,5        |              |            |             |
| Chukchi Sea        | UTN5         | 9,5         | 35,0        | 10,7        |              |            | 1,41        |

|                      |             |             |             |             |              |            |             |
|----------------------|-------------|-------------|-------------|-------------|--------------|------------|-------------|
| Chukchi Sea          | UTN5        | 11          | 26,9        | 10,7        |              | 1,1        |             |
| Chukchi Sea          | UTN5        | 13          | 32,9        | 10,3        |              |            |             |
| Chukchi Sea          | UTN5        | 15          | 28,5        | 9,7         |              |            |             |
| Chukchi Sea          | UTN5        | 17          | 27,4        | 9,8         |              |            | 1,14        |
| Chukchi Sea          | UTN5        | 19          | 27,9        | 10,1        |              |            |             |
| Chukchi Sea          | UTN5        | 21,5        | 29,5        | 9,7         |              |            |             |
| Chukchi Sea          | UTN5        | 24,5        | 27,4        | 10,7        |              |            |             |
| Chukchi Sea          | UTN5        | 27,5        | 30,4        | 10,9        |              | 0,7        | 2,76        |
| Chukchi Sea          | UTN5        | 30,5        | 31,0        | 11,9        |              |            |             |
| <b>Chukchi Sea</b>   | <b>UTN7</b> | <b>0,25</b> | <b>41,4</b> | <b>25,6</b> | <b>-21,1</b> | <b>1,5</b> | <b>1,53</b> |
| Chukchi Sea          | UTN7        | 0,75        | 39,9        | 23,9        | -21,0        | 1,7        |             |
| Chukchi Sea          | UTN7        | 1,25        | 38,7        | 21,5        |              | 1,9        |             |
| Chukchi Sea          | UTN7        | 1,75        | 39,7        | 20,9        | -21,0        | 1,3        | 0,85        |
| Chukchi Sea          | UTN7        | 2,5         | 40,8        | 20,9        |              | 0,9        |             |
| Chukchi Sea          | UTN7        | 3,5         | 42,0        | 20,8        | -21,0        | 1,2        |             |
| Chukchi Sea          | UTN7        | 4,5         | 42,5        | 19,2        |              | 1,5        | 0,58        |
| Chukchi Sea          | UTN7        | 5,5         | 38,6        | 18,9        | -21,6        | 1,7        |             |
| Chukchi Sea          | UTN7        | 6,5         | 38,8        | 19,2        |              | 1,3        |             |
| Chukchi Sea          | UTN7        | 7,5         | 40,1        | 18,1        | -21,7        | 1,3        | 1,05        |
| Chukchi Sea          | UTN7        | 8,5         | 37,4        | 18,1        |              | 1,2        |             |
| Chukchi Sea          | UTN7        | 9,5         | 39,5        | 18,4        | -21,4        | 1,3        |             |
| Chukchi Sea          | UTN7        | 11          | 38,6        | 16,9        |              | 1,7        | 1,18        |
| Chukchi Sea          | UTN7        | 13          | 42,9        | 16,7        | -21,4        | 1,4        |             |
| Chukchi Sea          | UTN7        | 15          | 38,7        | 19,0        | -21,3        | 2,8        |             |
| Chukchi Sea          | UTN7        | 17          | 39,6        | 19,1        | -21,4        | 1,2        | 1,61        |
| Chukchi Sea          | UTN7        | 19          | 40,0        | 19,0        |              | 1,2        |             |
| Chukchi Sea          | UTN7        | 21,5        | 39,1        | 18,7        | -21,4        | 1,8        | 1,95        |
| Chukchi Sea          | UTN7        | 24,5        | 40,2        | 18,8        | -21,7        | 1,7        |             |
| Chukchi Sea          | UTN7        | 27,5        | 39,0        | 18,6        |              | 0,8        | 2,66        |
| Chukchi Sea          | UTN7        | 30,5        | 38,2        | 17,6        | -21,3        | 1,0        |             |
| Chukchi Sea          | UTN7        | 33,5        | 40,1        | 15,8        | -21,3        | 1,5        | 2,73        |
| Chukchi Sea          | UTN7        | 36,5        | 32,8        | 11,7        | -21,2        | 0,8        |             |
| Chukchi Sea          | UTN7        | 39,5        | 31,8        | 12,7        |              | 1,0        | 2,86        |
| <b>Barrow Canyon</b> | <b>BC4</b>  | <b>0,25</b> | <b>71,0</b> | <b>18,7</b> | <b>-24,6</b> | <b>7,6</b> | <b>0,06</b> |
| Barrow Canyon        | BC4         | 0,75        | 69,1        | 16,8        | -25,1        | 8,0        |             |
| Barrow Canyon        | BC4         | 1,25        | 67,6        | 16,7        |              | 7,2        |             |
| Barrow Canyon        | BC4         | 1,75        | 65,4        | 16,1        | -24,0        | 4,4        | 0,09        |
| Barrow Canyon        | BC4         | 2,5         | 61,1        | 14,9        |              | 4,3        |             |
| Barrow Canyon        | BC4         | 3,5         | 61,7        | 16,5        | -24,0        | 5,0        |             |
| Barrow Canyon        | BC4         | 4,5         | 60,0        | 15,5        |              | 3,2        | 0,16        |
| Barrow Canyon        | BC4         | 5,5         | 57,7        | 13,9        | -23,8        | 3,5        |             |
| Barrow Canyon        | BC4         | 6,5         | 55,4        | 13,9        |              | 3,7        |             |
| Barrow Canyon        | BC4         | 7,5         | 54,4        | 15,1        | -23,6        | 1,5        | 0,37        |
| Barrow Canyon        | BC4         | 8,5         | 55,6        | 14,0        |              | 2,0        |             |
| Barrow Canyon        | BC4         | 9,5         | 50,9        | 13,4        | -23,4        | 3,1        |             |
| Barrow Canyon        | BC4         | 11          | 51,0        | 12,4        |              | 1,3        | 0,49        |
| Barrow Canyon        | BC4         | 13          | 49,0        | 14,2        | -23,4        |            |             |

|                      |            |             |             |             |              |            |             |
|----------------------|------------|-------------|-------------|-------------|--------------|------------|-------------|
| Barrow Canyon        | BC4        | 15          | 49,5        | 13,5        |              | 3,1        |             |
| Barrow Canyon        | BC4        | 17          | 42,4        | 12,7        | -23,2        | 2,0        | 0,67        |
| Barrow Canyon        | BC4        | 19          | 51,8        | 12,0        |              | 2,3        |             |
| Barrow Canyon        | BC4        | 21,5        | 44,8        | 10,5        | -22,9        | 2,9        |             |
| Barrow Canyon        | BC4        | 24,5        | 54,1        | 13,5        |              | 1,1        | 1,59        |
| Barrow Canyon        | BC4        | 27,5        | 43,5        | 12,3        | -24,7        |            |             |
| Barrow Canyon        | BC4        | 30,5        | 41,1        | 10,8        |              | 3,6        |             |
| Barrow Canyon        | BC4        | 33,5        | 39,2        | 11,0        | -23,4        | 3,1        | 1,58        |
| Barrow Canyon        | BC4        | 36,5        | 43,6        | 12,6        |              | 1,3        |             |
| Barrow Canyon        | BC4        | 39,5        | 53,1        | 12,2        | -24,0        | 3,4        | 2,27        |
| <b>Barrow Canyon</b> | <b>BC5</b> | <b>0,25</b> | <b>68,6</b> | <b>15,1</b> | <b>-24,0</b> | <b>5,3</b> |             |
| Barrow Canyon        | BC5        | 0,75        | 67,8        | 15,2        | -24,2        | 4,6        | 0,06        |
| Barrow Canyon        | BC5        | 1,25        | 61,9        | 18,1        | -24,2        | 1,0        |             |
| Barrow Canyon        | BC5        | 1,75        | 69,2        | 14,7        | -23,6        | 4,7        |             |
| Barrow Canyon        | BC5        | 2,5         | 50,2        | 12,8        | -23,5        | 3,6        | 0,04        |
| Barrow Canyon        | BC5        | 3,5         | 47,3        | 12,2        | -23,7        | 5,9        |             |
| Barrow Canyon        | BC5        | 4,5         | 57,2        | 16,4        | -23,0        | 3,7        |             |
| Barrow Canyon        | BC5        | 5,5         | 56,8        | 13,3        | -22,9        | 4,7        | 0,12        |
| Barrow Canyon        | BC5        | 6,5         | 49,1        | 12,7        | -23,4        | 5,5        | 0,00        |
| Barrow Canyon        | BC5        | 7,5         | 49,7        | 14,1        | -22,3        | 1,1        |             |
| Barrow Canyon        | BC5        | 8,5         | 52,1        | 13,8        | -22,8        | 2,7        | 0,17        |
| Barrow Canyon        | BC5        | 9,5         | 50,3        | 13,8        | -22,5        | 3,4        |             |
| Barrow Canyon        | BC5        | 11          | 55,6        | 14,0        | -22,7        | 3,2        |             |
| Barrow Canyon        | BC5        | 13          | 52,3        | 13,9        | -22,7        | 4,4        | 0,53        |
| Barrow Canyon        | BC5        | 15          | 51,0        | 13,5        | -22,9        | 4,7        |             |
| Barrow Canyon        | BC5        | 17          | 50,9        | 13,0        | -22,6        | 4,4        |             |
| Barrow Canyon        | BC5        | 19          | 50,6        | 12,5        | -23,3        | 4,7        | 1,09        |
| Barrow Canyon        | BC5        | 21,5        | 48,9        | 12,9        | -23,1        | 3,0        |             |
| Barrow Canyon        | BC5        | 24,5        | 48,1        | 12,7        | -23,4        | 3,2        | 0,42        |
| Barrow Canyon        | BC5        | 27,5        | 57,7        |             | -24,9        | 4,8        |             |
| Barrow Canyon        | BC5        | 30,5        | 57,0        |             | -24,5        | 5,9        | 0,55        |
| Barrow Canyon        | BC5        | 33,5        | 63,1        |             | -24,6        | 5,4        | 2,18        |
| <b>Barrow Canyon</b> | <b>BC6</b> | <b>0,25</b> | <b>78,0</b> | <b>17,0</b> | <b>-25,1</b> | <b>6,4</b> | <b>0,06</b> |
| Barrow Canyon        | BC6        | 0,75        | 78,7        | 17,3        | -25,2        | 7,0        |             |
| Barrow Canyon        | BC6        | 1,25        | 78,1        | 18,0        |              | 6,9        |             |
| Barrow Canyon        | BC6        | 1,75        | 71,7        | 17,4        | -24,9        | 8,1        | 0,08        |
| Barrow Canyon        | BC6        | 2,5         | 74,6        | 17,4        |              | 8,8        |             |
| Barrow Canyon        | BC6        | 3,5         | 69,9        | 15,8        | -25,0        | 9,1        |             |
| Barrow Canyon        | BC6        | 4,5         | 67,7        | 15,9        |              | 7,7        | 0,10        |
| Barrow Canyon        | BC6        | 5,5         | 78,8        | 17,0        | -23,4        | 3,3        |             |
| Barrow Canyon        | BC6        | 6,5         | 81,6        | 17,0        |              | 2,7        |             |
| Barrow Canyon        | BC6        | 7,5         | 82,8        | 16,6        | -23,5        | 2,9        | 0,04        |
| Barrow Canyon        | BC6        | 8,5         | 82,1        | 17,0        |              | 2,6        |             |
| Barrow Canyon        | BC6        | 9,5         | 83,1        | 16,5        | -23,6        | 2,9        |             |
| Barrow Canyon        | BC6        | 11          | 77,9        | 17,9        |              | 1,2        | 0,02        |
| Barrow Canyon        | BC6        | 13          | 75,6        | 15,7        | -23,6        | 3,1        |             |
| Barrow Canyon        | BC6        | 15          | 70,0        | 15,8        |              | 4,3        |             |

|                     |            |             |             |             |              |            |      |
|---------------------|------------|-------------|-------------|-------------|--------------|------------|------|
| Barrow Canyon       | BC6        | 17          | 79,7        | 15,5        | -24,9        | 7,7        | 0,43 |
| Barrow Canyon       | BC6        | 19          | 78,9        | 15,7        |              | 8,4        |      |
| Barrow Canyon       | BC6        | 21,5        | 76,4        | 16,1        | -25,1        | 8,1        |      |
| Barrow Canyon       | BC6        | 24,5        | 62,3        | 14,6        |              | 2,4        | 0,16 |
| Barrow Canyon       | BC6        | 27,5        | 62,9        | 15,1        | -22,7        | 1,9        |      |
| Barrow Canyon       | BC6        | 30,5        | 67,0        | 16,4        |              | 1,7        | 0,18 |
| Barrow Canyon       | BC6        | 33,5        | 64,7        | 16,4        | -22,7        | 2,4        |      |
| Barrow Canyon       | BC6        | 36,5        | 63,2        | 14,7        | -22,9        | 2,1        | 1,10 |
| Barrow Canyon       | BC6        | 39,5        | 62,4        | 14,5        | -23,5        | 2,0        |      |
| Barrow Canyon       | BC6        | 42,5        | 61,0        | 14,4        | -23,0        | 2,4        | 0,67 |
| Barrow Canyon       | BC6        | 45,5        | 67,2        | 15,2        |              | 2,4        |      |
| Barrow Canyon       | BC6        | 48,5        | 59,7        | 15,5        | -22,9        | 2,2        | 1,15 |
| <b>Beaufort Sea</b> | <b>CG1</b> | <b>0,25</b> | <b>60,0</b> | <b>12,6</b> | <b>-23,6</b> | <b>8,3</b> |      |
| Beaufort Sea        | CG1        | 0,75        | 64,3        | 12,2        | -24,2        | 9,1        | 0,02 |
| Beaufort Sea        | CG1        | 1,25        | 61,9        | 10,7        |              | 9,7        |      |
| Beaufort Sea        | CG1        | 1,75        | 59,2        | 10,4        | -24,2        | 10,1       |      |
| Beaufort Sea        | CG1        | 2,5         | 61,6        | 11,2        |              | 9,6        | 0,02 |
| Beaufort Sea        | CG1        | 3,5         | 58,1        | 11,4        | -24,2        | 9,3        |      |
| Beaufort Sea        | CG1        | 4,5         | 59,8        | 10,5        |              | 9,1        |      |
| Beaufort Sea        | CG1        | 5,5         | 61,7        | 10,3        | -24,2        | 9,4        | 0,03 |
| Beaufort Sea        | CG1        | 6,5         | 54,2        | 10,0        |              | 8,8        |      |
| Beaufort Sea        | CG1        | 7,5         | 54,7        | 10,0        | -24,3        | 9,3        |      |
| Beaufort Sea        | CG1        | 8,5         | 55,0        | 9,5         |              | 11,7       | 0,07 |
| Beaufort Sea        | CG1        | 9,5         | 60,4        | 10,4        | -24,3        | 8,9        |      |
| Beaufort Sea        | CG1        | 11          | 53,7        | 10,4        |              | 9,2        |      |
| Beaufort Sea        | CG1        | 13          | 55,3        | 11,4        | -24,3        | 8,0        | 0,07 |
| Beaufort Sea        | CG1        | 15          | 52,8        | 10,0        |              | 8,7        |      |
| Beaufort Sea        | CG1        | 17          | 51,7        | 10,0        | -24,5        | 8,8        |      |
| Beaufort Sea        | CG1        | 19          | 50,2        | 9,6         |              | 9,6        | 0,38 |
| Beaufort Sea        | CG1        | 21,5        | 51,3        | 9,2         | -24,1        | 9,8        | 0,27 |
| Beaufort Sea        | CG1        | 24,5        | 53,7        | 9,8         | -24,1        | 9,1        |      |
| Beaufort Sea        | CG1        | 27,5        | 55,6        | 10,0        | -24,7        | 9,1        | 0,55 |
| Beaufort Sea        | CG1        | 30,5        | 54,7        | 10,3        |              | 7,7        |      |
| Beaufort Sea        | CG1        | 33,5        | 53,9        | 10,2        | -24,7        | 9,2        | 0,29 |
| Beaufort Sea        | CG1        | 36,5        | 55,8        | 10,4        |              | 8,1        |      |
| Beaufort Sea        | CG1        | 39,5        | 55,7        | 9,9         | -24,3        | 8,3        | 0,34 |
| Beaufort Sea        | CG1        | 42,5        | 54,6        | 10,3        |              | 8,7        |      |
| <b>Beaufort Sea</b> | <b>CG2</b> | <b>0,25</b> | <b>91,9</b> | <b>15,0</b> | <b>-24,0</b> | <b>4,1</b> |      |
| Beaufort Sea        | CG2        | 0,75        | 91,9        | 14,3        | -23,8        | 4,0        |      |
| Beaufort Sea        | CG2        | 1,25        | 89,9        | 13,6        |              |            |      |
| Beaufort Sea        | CG2        | 1,75        | 90,8        | 13,1        |              |            | 0,05 |
| Beaufort Sea        | CG2        | 2,5         | 91,1        | 13,3        |              |            |      |
| Beaufort Sea        | CG2        | 3,5         | 87,3        | 12,5        |              |            |      |
| Beaufort Sea        | CG2        | 4,5         | 85,7        | 12,2        |              |            | 0,02 |
| Beaufort Sea        | CG2        | 5,5         | 83,4        | 12,3        |              |            |      |
| Beaufort Sea        | CG2        | 6,5         | 78,4        | 11,9        |              |            |      |
| Beaufort Sea        | CG2        | 7,5         | 80,1        | 12,0        |              |            | 0,02 |

|                        |            |             |              |             |               |             |              |
|------------------------|------------|-------------|--------------|-------------|---------------|-------------|--------------|
| Beaufort Sea           | CG2        | 8,5         | 78,0         |             |               |             |              |
| Beaufort Sea           | CG2        | 9,5         | 75,1         |             |               |             |              |
| Beaufort Sea           | CG2        | 11          | 74,3         | 11,2        |               | 3,0         | 0,03         |
| Beaufort Sea           | CG2        | 13          | 72,3         | 11,1        |               |             |              |
| Beaufort Sea           | CG2        | 15          | 82,8         | 11,0        |               |             |              |
| Beaufort Sea           | CG2        | 17          | 80,8         | 10,8        |               |             | 0,04         |
| Beaufort Sea           | CG2        | 19          | 79,7         | 11,1        |               |             |              |
| Beaufort Sea           | CG2        | 21,5        | 78,0         | 11,6        |               |             |              |
| Beaufort Sea           | CG2        | 24,5        | 75,0         | 11,5        |               |             |              |
| Beaufort Sea           | CG2        | 27,5        | 73,3         | 12,1        |               |             | 0,08         |
| Beaufort Sea           | CG2        | 30,5        | 73,2         | 12,0        |               |             |              |
| Beaufort Sea           | CG2        | 33,5        | 73,3         | 12,0        |               |             |              |
| Beaufort Sea           | CG2        | 36,5        | 71,0         | 12,2        |               | 4,1         | 0,14         |
| Beaufort Sea           | CG2        | 39,5        | 73,3         | 11,6        |               |             |              |
| Beaufort Sea           | CG2        | 42,5        | 71,8         | 12,0        |               |             |              |
| <b>Beaufort Sea</b>    | <b>CG3</b> | <b>0,25</b> | <b>98,0</b>  | <b>15,8</b> | <b>-24,5</b>  | <b>3,7</b>  |              |
| Beaufort Sea           | CG3        | 0,75        | 97,5         | 14,8        | -24,3         | 3,2         | 0,04         |
| Beaufort Sea           | CG3        | 1,25        | 96,2         | 14,3        |               |             |              |
| Beaufort Sea           | CG3        | 1,75        | 95,0         | 13,6        |               |             |              |
| Beaufort Sea           | CG3        | 2,5         | 90,3         | 13,4        |               |             | 0,04         |
| Beaufort Sea           | CG3        | 3,5         | 88,3         | 13,4        |               |             |              |
| Beaufort Sea           | CG3        | 4,5         | 88,7         | 13,2        |               |             |              |
| Beaufort Sea           | CG3        | 5,5         | 85,4         | 13,6        |               |             | 0,04         |
| Beaufort Sea           | CG3        | 6,5         | 84,6         | 13,4        |               |             |              |
| Beaufort Sea           | CG3        | 7,5         | 82,0         | 13,1        |               |             |              |
| Beaufort Sea           | CG3        | 8,5         | 80,0         | 13,1        |               |             | 0,03         |
| Beaufort Sea           | CG3        | 9,5         | 83,0         | 12,9        |               |             |              |
| Beaufort Sea           | CG3        | 11          | 80,9         | 13,2        |               | 3,1         |              |
| Beaufort Sea           | CG3        | 13          | 78,3         | 12,4        |               |             | 0,03         |
| Beaufort Sea           | CG3        | 15          | 80,0         | 12,6        |               |             |              |
| Beaufort Sea           | CG3        | 17          | 81,0         | 12,5        |               |             |              |
| Beaufort Sea           | CG3        | 19          | 82,0         | 12,2        |               |             | 0,05         |
| Beaufort Sea           | CG3        | 21,5        | 80,5         | 12,6        |               |             |              |
| Beaufort Sea           | CG3        | 24,5        | 83,4         | 12,4        |               |             | 0,05         |
| Beaufort Sea           | CG3        | 27,5        | 82,4         | 12,3        |               |             |              |
| Beaufort Sea           | CG3        | 30,5        | 80,9         | 12,0        |               |             | 0,07         |
| Beaufort Sea           | CG3        | 33,5        | 83,1         | 12,8        |               | 3,4         |              |
| Beaufort Sea           | CG3        | 36,5        | 78,5         | 12,0        |               |             | 0,13         |
| Beaufort Sea           | CG3        | 39,5        | 79,0         | 11,4        |               |             |              |
| <b>Can. Arhipelago</b> | <b>QM1</b> | <b>0,25</b> | <b>21,68</b> | <b>7,7</b>  | <b>-21,74</b> | <b>12,3</b> | <b>0,004</b> |
| Can. Arhipelago        | QM1        | 0,75        | 22,35        | 7,0         |               | 12,8        |              |
| Can. Arhipelago        | QM1        | 1,25        | 22,19        | 6,9         | -21,65        | 12,7        |              |
| Can. Arhipelago        | QM1        | 1,75        | 21,48        | 5,9         |               | 13,2        |              |
| Can. Arhipelago        | QM1        | 2,5         | 20,98        | 6,1         | -21,54        | 12,5        | 0,039        |
| Can. Arhipelago        | QM1        | 3,5         | 23,01        | 6,6         |               | 11,5        |              |
| Can. Arhipelago        | QM1        | 4,5         | 22,31        | 6,0         | -21,41        | 12,9        | 0,047        |
| Can. Arhipelago        | QM1        | 5,5         | 22,05        | 6,1         |               | 12,8        | 0,040        |

|                        |            |             |             |            |        |             |              |
|------------------------|------------|-------------|-------------|------------|--------|-------------|--------------|
| Can. Arhipelago        | QM1        | 6,5         | 22,24       | 6,1        | -21,88 | 13,4        | 0,125        |
| Can. Arhipelago        | QM1        | 7,5         | 18,20       | 5,8        |        | 12,7        |              |
| Can. Arhipelago        | QM1        | 8,5         | 20,17       | 5,4        | -21,64 | 12,6        | 0,092        |
| Can. Arhipelago        | QM1        | 9,5         | 16,92       | 6,6        |        | 12,0        | 0,204        |
| Can. Arhipelago        | QM1        | 11          | 16,40       | 5,0        | -21,49 | 12,7        |              |
| Can. Arhipelago        | QM1        | 13          | 20,73       | 6,7        |        | 11,5        | 0,186        |
| Can. Arhipelago        | QM1        | 15          | 15,71       | 5,2        | -21,09 | 12,4        | 0,196        |
| Can. Arhipelago        | QM1        | 17          | 14,73       | 5,4        |        | 12,0        |              |
| Can. Arhipelago        | QM1        | 19          | 14,22       | 4,7        | -20,98 | 11,4        | 0,266        |
| Can. Arhipelago        | QM1        | 21,5        | 13,14       | 5,0        |        | 11,8        | 0,211        |
| <b>Can. Arhipelago</b> | <b>FS1</b> | <b>0,25</b> | <b>23,1</b> | <b>4,8</b> |        | <b>35,1</b> | <b>0,006</b> |
| Can. Arhipelago        | FS1        | 0,75        | 25,0        | 4,9        |        | 38,7        |              |
| Can. Arhipelago        | FS1        | 1,25        | 27,9        | 5,2        |        | 38,6        |              |
| Can. Arhipelago        | FS1        | 1,75        | 24,6        | 5,0        |        | 38,3        | 0,008        |
| Can. Arhipelago        | FS1        | 2,5         | 26,6        | 4,8        |        | 34,8        |              |
| Can. Arhipelago        | FS1        | 3,5         | 22,3        | 4,5        |        | 34,9        |              |
| Can. Arhipelago        | FS1        | 4,5         | 20,2        | 4,3        |        | 38,1        | 0,007        |
| Can. Arhipelago        | FS1        | 5,5         | 19,7        | 4,1        |        | 33,7        |              |
| Can. Arhipelago        | FS1        | 6,5         | 16,1        | 3,9        |        | 34,0        |              |
| Can. Arhipelago        | FS1        | 7,5         | 15,6        | 4,7        |        | 44,8        |              |
| Can. Arhipelago        | FS1        | 9           | 14,4        | 3,7        |        | 38,3        | 0,008        |
| Can. Arhipelago        | FS1        | 11          | 13,6        | 3,3        |        | 40,6        | 0,006        |
| Can. Arhipelago        | FS1        | 13          | 12,4        | 3,2        |        | 39,4        |              |
| Can. Arhipelago        | FS1        | 15          | 9,6         | 1,8        |        | 35,1        | 0,005        |
| Can. Arhipelago        | FS1        | 17          | 9,7         | 1,6        | -22,5  | 37,5        | 0,005        |
| Can. Arhipelago        | FS1        | 19          | 9,2         | 1,5        |        | 37,5        |              |
| Can. Arhipelago        | FS1        | 21,5        | 7,2         | 1,0        |        | 45,2        | 0,011        |
| <b>Can. Arhipelago</b> | <b>BE2</b> | <b>0,25</b> | <b>30,2</b> |            |        |             | <b>0,042</b> |
| Can. Arhipelago        | BE2        | 0,75        | 30,9        | 5,5        |        | 44,8        |              |
| Can. Arhipelago        | BE2        | 1,25        | 31,7        | 5,1        | -21,1  | 42,8        |              |
| Can. Arhipelago        | BE2        | 1,75        | 30,4        | 5,3        |        | 42,5        |              |
| Can. Arhipelago        | BE2        | 2,5         | 30,4        | 5,3        |        | 44,8        | 0,009        |
| Can. Arhipelago        | BE2        | 3,5         | 28,3        | 5,1        |        | 43,4        |              |
| Can. Arhipelago        | BE2        | 4,5         | 26,9        | 5,4        | -21,8  | 44,3        |              |
| Can. Arhipelago        | BE2        | 5,5         | 26,5        | 5,2        |        | 44,8        |              |
| Can. Arhipelago        | BE2        | 6,5         | 24,7        | 5,1        |        | 44,1        | 0,008        |
| Can. Arhipelago        | BE2        | 7,5         | 23,7        | 3,7        | -21,2  | 32,7        |              |
| Can. Arhipelago        | BE2        | 8,5         | 23,0        | 4,3        |        | 44,9        |              |
| Can. Arhipelago        | BE2        | 9,5         | 22,8        | 4,3        |        | 43,7        | 0,033        |
| Can. Arhipelago        | BE2        | 11          | 23,1        |            | -21,3  |             |              |
| Can. Arhipelago        | BE2        | 13          | 22,6        | 4,2        |        | 40,8        |              |
| Can. Arhipelago        | BE2        | 15          | 22,8        | 4,2        |        | 43,6        | 0,009        |
| Can. Arhipelago        | BE2        | 17          | 21,4        | 4,2        |        | 45,3        |              |
| Can. Arhipelago        | BE2        | 19          | 21,4        | 3,9        |        | 42,6        | 0,011        |
| Can. Arhipelago        | BE2        | 21,5        | 21,6        | 4,0        |        | 41,9        |              |
| Can. Arhipelago        | BE2        | 24,5        | 21,4        | 3,9        |        | 44,1        |              |
| Can. Arhipelago        | BE2        | 27,5        | 22,2        | 3,8        |        | 45,3        | 0,008        |

|                        |            |             |             |            |              |             |              |
|------------------------|------------|-------------|-------------|------------|--------------|-------------|--------------|
| Can. Arhipelago        | BE2        | 30,5        | 21,2        | 3,9        |              | 44,6        |              |
| Can. Arhipelago        | BE2        | 33,5        | 20,3        | 3,7        |              | 45,8        |              |
| Can. Arhipelago        | BE2        | 36,5        | 19,1        | 3,6        |              | 46,0        |              |
| Can. Arhipelago        | BE2        | 39,5        | 20,9        | 3,8        |              | 44,7        | 0,005        |
| <b>Can. Arhipelago</b> | <b>VS1</b> | <b>0,25</b> | <b>46,7</b> | <b>8,9</b> | <b>-21,0</b> | <b>31,5</b> | <b>0,002</b> |
| Can. Arhipelago        | VS1        | 0,75        | 45,7        | 8,6        |              | 31,5        |              |
| Can. Arhipelago        | VS1        | 1,25        | 45,4        | 8,6        | -21,0        | 31,2        | 0,000        |
| Can. Arhipelago        | VS1        | 1,75        | 43,3        | 8,6        |              | 31,5        |              |
| Can. Arhipelago        | VS1        | 2,5         | 37,5        | 8,2        | -20,6        | 31,1        | 0,005        |
| Can. Arhipelago        | VS1        | 3,5         | 34,2        | 8,1        |              | 30,9        |              |
| Can. Arhipelago        | VS1        | 4,5         | 33,7        | 7,7        | -20,3        | 30,6        | 0,005        |
| Can. Arhipelago        | VS1        | 5,5         | 37,4        | 7,2        |              | 31,7        |              |
| Can. Arhipelago        | VS1        | 6,5         | 36,8        | 6,8        | -20,9        | 32,8        | 0,012        |
| Can. Arhipelago        | VS1        | 7,5         | 34,4        | 6,6        |              | 33,3        |              |
| Can. Arhipelago        | VS1        | 8,5         | 34,5        | 6,5        | -21,2        | 33,4        |              |
| Can. Arhipelago        | VS1        | 9,5         | 34,9        | 6,5        |              | 33,5        | 0,016        |
| Can. Arhipelago        | VS1        | 11          | 33,3        | 6,4        | -21,3        | 33,4        | 0,020        |
| Can. Arhipelago        | VS1        | 13          | 32,3        | 6,3        |              | 33,2        |              |
| Can. Arhipelago        | VS1        | 15          | 32,9        | 6,1        | -21,4        | 33,1        | 0,018        |
| Can. Arhipelago        | VS1        | 17          | 32,1        | 6,1        |              | 33,7        |              |
| Can. Arhipelago        | VS1        | 19          | 32,5        | 6,0        | -21,7        | 34,2        | 0,018        |
| Can. Arhipelago        | VS1        | 21,5        | 32,2        | 5,9        |              | 34,1        |              |
| Can. Arhipelago        | VS1        | 24,5        | 31,0        | 6,0        | -21,9        | 33,8        | 0,029        |
| Can. Arhipelago        | VS1        | 27,5        | 30,5        | 6,0        |              | 34,1        | 0,065        |
| Can. Arhipelago        | VS1        | 30,5        | 29,7        | 5,9        | -21,8        | 34,1        |              |
| Can. Arhipelago        | VS1        | 33,5        | 30,0        | 5,7        |              | 34,0        |              |
| Can. Arhipelago        | VS1        | 36,5        | 28,4        | 5,5        | -21,9        | 34,2        | 0,157        |
| Can. Arhipelago        | VS1        | 39,5        | 28,5        | 5,5        |              | 34,4        | 0,181        |
| <b>Can. Arhipelago</b> | <b>PS2</b> | <b>0,25</b> | <b>23,1</b> | <b>5,2</b> |              | <b>51,2</b> | <b>0,013</b> |
| Can. Arhipelago        | PS2        | 0,75        | 24,1        | 5,1        |              | 51,5        |              |
| Can. Arhipelago        | PS2        | 1,25        | 24,9        | 4,8        | -21,5        | 50,7        |              |
| Can. Arhipelago        | PS2        | 1,75        | 25,4        | 4,5        |              | 51,3        |              |
| Can. Arhipelago        | PS2        | 2,5         | 25,4        | 4,5        |              | 51,1        | 0,011        |
| Can. Arhipelago        | PS2        | 3,5         | 24,9        | 4,5        |              | 50,5        |              |
| Can. Arhipelago        | PS2        | 4,5         | 25,0        | 4,6        |              | 50,4        |              |
| Can. Arhipelago        | PS2        | 5,5         | 23,9        | 4,8        |              | 50,8        |              |
| Can. Arhipelago        | PS2        | 6,5         | 22,1        | 4,4        | -21,9        | 50,7        | 0,010        |
| Can. Arhipelago        | PS2        | 7,5         | 23,2        | 4,5        |              | 50,9        |              |
| Can. Arhipelago        | PS2        | 8,5         | 22,6        | 4,4        | -21,9        | 50,8        |              |
| Can. Arhipelago        | PS2        | 9,5         | 22,8        | 4,3        |              | 51,0        | 0,014        |
| Can. Arhipelago        | PS2        | 11          | 22,0        | 5,1        | -21,9        | 50,3        |              |
| Can. Arhipelago        | PS2        | 13          | 21,5        | 4,1        |              | 51,6        |              |
| Can. Arhipelago        | PS2        | 15          | 21,3        | 4,6        |              | 51,0        |              |
| Can. Arhipelago        | PS2        | 17          | 20,9        | 4,1        |              | 51,3        |              |
| Can. Arhipelago        | PS2        | 19          | 19,9        | 3,8        | -21,8        | 51,5        | 0,008        |
| Can. Arhipelago        | PS2        | 21,5        | 19,0        | 3,9        |              | 50,7        |              |
| Can. Arhipelago        | PS2        | 24,5        | 19,0        | 4,2        | -22,1        | 50,6        |              |

|                        |             |             |             |             |              |             |              |
|------------------------|-------------|-------------|-------------|-------------|--------------|-------------|--------------|
| Can. Arhipelago        | PS2         | 27,5        | 19,7        | 3,4         |              | 50,9        | 0,009        |
| Can. Arhipelago        | PS2         | 30,5        | 18,6        | 3,3         |              | 50,8        |              |
| Can. Arhipelago        | PS2         | 33,5        | 18,6        | 3,7         |              | 49,7        |              |
| Can. Arhipelago        | PS2         | 36,5        | 18,0        | 3,2         | -22,2        | 50,3        | 0,008        |
| Can. Arhipelago        | PS2         | 39,5        | 18,4        | 3,3         |              | 49,9        |              |
| Can. Arhipelago        | PS2         | 42,5        | 19,4        | 3,2         | -22,3        | 49,4        |              |
| Can. Arhipelago        | PS2         | 45,5        | 18,0        |             |              |             |              |
| Can. Arhipelago        | PS2         | 48,5        | 17,7        | 3,2         |              | 46,9        | 0,008        |
| <b>Can. Arhipelago</b> | <b>PS1</b>  | <b>0,25</b> | <b>51,5</b> | <b>10,5</b> | <b>-20,5</b> | <b>37,3</b> | <b>0,004</b> |
| Can. Arhipelago        | PS1         | 0,75        | 51,2        | 10,1        |              | 38,4        |              |
| Can. Arhipelago        | PS1         | 1,25        | 51,2        | 10,1        |              | 35,8        |              |
| Can. Arhipelago        | PS1         | 1,75        | 50,1        | 10,0        |              | 36,1        |              |
| Can. Arhipelago        | PS1         | 2,5         | 44,7        | 9,4         |              | 35,9        | 0,014        |
| Can. Arhipelago        | PS1         | 3,5         | 42,8        | 8,9         |              | 37,3        |              |
| Can. Arhipelago        | PS1         | 4,5         | 41,6        | 8,1         | -21,5        | 38,0        |              |
| Can. Arhipelago        | PS1         | 5,5         | 40,4        | 8,0         |              | 38,3        |              |
| Can. Arhipelago        | PS1         | 6,5         | 40,8        | 7,9         |              | 39,6        |              |
| Can. Arhipelago        | PS1         | 7,5         | 40,1        | 8,0         |              | 39,0        | 0,020        |
| Can. Arhipelago        | PS1         | 8,5         | 40,6        | 8,1         |              | 39,5        |              |
| Can. Arhipelago        | PS1         | 9,5         | 40,1        | 7,9         |              | 39,4        | 0,023        |
| Can. Arhipelago        | PS1         | 11          | 38,7        | 7,8         | -21,0        | 39,5        |              |
| Can. Arhipelago        | PS1         | 13          | 36,1        | 7,5         |              | 39,3        |              |
| Can. Arhipelago        | PS1         | 15          | 34,8        | 7,2         | -21,8        | 40,1        |              |
| Can. Arhipelago        | PS1         | 17          | 34,1        | 7,0         |              | 40,5        |              |
| Can. Arhipelago        | PS1         | 19          | 32,3        | 6,5         | -21,9        | 40,7        | 0,024        |
| Can. Arhipelago        | PS1         | 21,5        | 31,9        | 6,4         |              | 39,9        |              |
| Can. Arhipelago        | PS1         | 24,5        | 31,6        | 6,3         | -22,0        | 39,8        |              |
| Can. Arhipelago        | PS1         | 27,5        | 30,4        | 6,6         |              | 39,7        | 0,030        |
| Can. Arhipelago        | PS1         | 30,5        | 28,6        | 5,8         | -22,3        | 41,8        |              |
| Can. Arhipelago        | PS1         | 33,5        | 28,2        | 5,4         |              | 41,6        |              |
| Can. Arhipelago        | PS1         | 36,5        | 27,0        | 5,3         | -22,5        | 41,5        | 0,042        |
| Can. Arhipelago        | PS1         | 39,5        | 28,2        | 5,4         |              | 40,9        |              |
| Can. Arhipelago        | PS1         | 42,5        | 29,8        | 5,8         | -22,6        | 41,6        |              |
| Can. Arhipelago        | PS1         | 45,5        | 27,2        | 5,7         |              | 41,6        | 0,064        |
| <b>Lancaster Sound</b> | <b>CAA2</b> | <b>0,5</b>  | <b>24,1</b> | <b>7,7</b>  |              | <b>69,6</b> | <b>0,074</b> |
| Lancaster Sound        | CAA2        | 1,5         | 20,1        | 7,0         |              | 69,6        | 0,076        |
| Lancaster Sound        | CAA2        | 3           | 21,7        | 7,4         |              | 64,1        | 0,143        |
| Lancaster Sound        | CAA2        | 5           | 24,5        | 7,7         |              | 67,8        | 0,605        |
| Lancaster Sound        | CAA2        | 7           | 21,7        | 7,8         |              | 64,7        | 0,735        |
| Lancaster Sound        | CAA2        | 9           | 21,1        | 8,2         |              | 62,4        | 0,763        |
| Lancaster Sound        | CAA2        | 11          | 22,1        | 8,3         |              | 65,6        | 1,024        |
| <b>Lancaster Sound</b> | <b>CAA1</b> | <b>0,25</b> | <b>30,4</b> | <b>10,1</b> | <b>-21,6</b> | <b>12,8</b> | <b>0,020</b> |
| Lancaster Sound        | CAA1        | 0,75        | 36,3        | 11,3        | -21,8        | 16,4        |              |
| Lancaster Sound        | CAA1        | 1,25        | 28,5        | 11,8        | -21,6        | 12,3        |              |
| Lancaster Sound        | CAA1        | 1,75        | 29,6        | 11,1        | -21,8        | 19,2        | 0,020        |
| Lancaster Sound        | CAA1        | 2,5         | 29,3        | 10,8        | -21,7        | 16,8        |              |
| Lancaster Sound        | CAA1        | 3,5         | 26,1        | 11,3        | -21,8        | 19,7        | 0,017        |

|                     |             |             |             |             |              |             |              |
|---------------------|-------------|-------------|-------------|-------------|--------------|-------------|--------------|
| Lancaster Sound     | CAA1        | 4,5         | 26,7        | 10,5        | -21,8        | 21,6        | 0,063        |
| Lancaster Sound     | CAA1        | 5,5         | 32,2        | 12,2        | -22,0        | 14,6        |              |
| Lancaster Sound     | CAA1        | 6,5         | 33,0        | 10,3        | -21,9        | 20,2        | 0,027        |
| Lancaster Sound     | CAA1        | 7,5         | 30,7        | 10,5        | -21,9        | 19,7        | 0,031        |
| Lancaster Sound     | CAA1        | 8,5         | 27,0        | 9,6         | -21,8        | 17,4        | 0,036        |
| Lancaster Sound     | CAA1        | 9,5         | 26,3        | 10,8        | -21,9        | 17,3        | 0,046        |
| Lancaster Sound     | CAA1        | 11          | 27,9        | 11,3        | -22,0        | 16,1        | 0,096        |
| Lancaster Sound     | CAA1        | 13          | 31,3        | 12,1        | -22,0        | 22,5        | 0,285        |
| Lancaster Sound     | CAA1        | 15          | 30,2        | 12,4        | -21,9        | 15,7        | 0,348        |
| Lancaster Sound     | CAA1        | 17          | 26,8        | 11,3        | -22,1        | 21,0        |              |
| Lancaster Sound     | CAA1        | 19          | 22,9        | 9,2         | -22,3        | 25,3        | 1,055        |
| <b>Baffin Bay</b>   | <b>BB11</b> | <b>0,25</b> | <b>54,6</b> | <b>17,8</b> | <b>-22,0</b> | <b>12,4</b> | <b>0,031</b> |
| Baffin Bay          | BB11        | 0,75        | 55,6        | 17,9        | -22,0        | 12,1        |              |
| Baffin Bay          | BB11        | 1,25        | 55,0        | 18,2        | -21,7        | 12,4        |              |
| Baffin Bay          | BB11        | 1,75        | 54,0        | 18,4        | -21,7        | 11,6        | 0,027        |
| Baffin Bay          | BB11        | 2,5         | 56,7        | 16,9        | -21,8        | 11,4        |              |
| Baffin Bay          | BB11        | 3,5         | 53,0        | 16,4        | -21,9        | 11,7        |              |
| Baffin Bay          | BB11        | 4,5         | 49,9        | 16,0        | -22,0        | 13,3        |              |
| Baffin Bay          | BB11        | 5,5         | 45,6        | 16,3        | -22,1        | 13,6        | 0,032        |
| Baffin Bay          | BB11        | 6,5         | 43,6        | 16,2        | -22,1        | 14,2        |              |
| Baffin Bay          | BB11        | 7,5         | 41,8        | 16,5        | -22,1        | 12,3        | 0,043        |
| Baffin Bay          | BB11        | 8,5         | 40,8        | 16,9        | -22,1        | 13,7        |              |
| Baffin Bay          | BB11        | 9,5         | 44,0        | 17,0        | -22,1        | 13,8        | 0,042        |
| Baffin Bay          | BB11        | 11          | 39,7        | 16,9        | -22,0        | 14,7        |              |
| Baffin Bay          | BB11        | 13          | 39,0        | 17,2        | -22,1        | 14,6        |              |
| Baffin Bay          | BB11        | 15          | 38,7        | 17,1        | -22,0        | 15,1        | 0,045        |
| Baffin Bay          | BB11        | 17          | 36,0        | 17,2        | -22,1        | 15,3        |              |
| Baffin Bay          | BB11        | 19          | 34,9        | 17,0        | -22,1        | 16,0        | 0,046        |
| Baffin Bay          | BB11        | 21,5        | 33,6        | 16,7        | -22,1        | 15,8        |              |
| Baffin Bay          | BB11        | 24,5        | 32,9        | 16,1        | -22,1        | 15,9        |              |
| Baffin Bay          | BB11        | 27,5        | 33,3        | 16,3        | -22,1        | 16,1        | 0,150        |
| Baffin Bay          | BB11        | 30,5        | 32,5        | 16,3        | -22,2        | 16,0        | 0,275        |
| Baffin Bay          | BB11        | 33,5        | 38,2        | 16,3        | -22,3        | 16,3        |              |
| Baffin Bay          | BB11        | 36,5        | 32,9        | 16,6        | -22,3        | 16,5        | 0,551        |
| Baffin Bay          | BB11        | 39,5        | 30,7        | 16,2        | -22,3        | 17,0        | 0,519        |
| Baffin Bay          | BB11        | 42,5        | 30,7        | 15,7        | -22,3        | 17,2        |              |
| Baffin Bay          | BB11        | 45,5        | 30,5        | 15,6        |              | 17,5        | 0,434        |
| <b>Davis Strait</b> | <b>DS5</b>  | <b>0,25</b> | <b>6,4</b>  | <b>3,9</b>  | <b>-20,4</b> | <b>1,0</b>  | <b>0,010</b> |
| Davis Strait        | DS5         | 0,75        | 6,9         | 4,7         |              | 1,0         |              |
| Davis Strait        | DS5         | 1,25        | 6,9         | 4,3         | -20,5        | 1,1         |              |
| Davis Strait        | DS5         | 1,75        | 7,0         | 4,5         |              | 0,8         | 0,015        |
| Davis Strait        | DS5         | 2,5         | 6,4         | 3,8         |              | 0,9         |              |
| Davis Strait        | DS5         | 3,5         | 7,0         | 3,7         |              | 0,9         | 0,018        |
| Davis Strait        | DS5         | 4,5         | 4,8         | 3,4         | -20,4        | 1,0         | 0,022        |
| Davis Strait        | DS5         | 5,5         | 3,7         | 3,1         |              | 1,1         |              |
| Davis Strait        | DS5         | 6,5         | 3,4         | 2,7         | -20,3        | 1,0         | 0,064        |
| Davis Strait        | DS5         | 7,5         | 2,2         | 2,4         | -20,2        | 1,0         | 0,059        |

|                     |            |             |             |            |       |             |               |
|---------------------|------------|-------------|-------------|------------|-------|-------------|---------------|
| Davis Strait        | DS5        | 8,5         | 2,2         | 2,1        | -20,2 | 1,0         |               |
| Davis Strait        | DS5        | 9,5         | 2,4         | 1,7        | -20,1 | 0,9         | 0,110         |
| Davis Strait        | DS5        | 11          | 2,4         | 1,8        | -20,1 | 1,0         | 0,048         |
| Davis Strait        | DS5        | 13          | 2,8         | 1,7        | -20,1 | 1,1         |               |
| Davis Strait        | DS5        | 15          | 2,8         | 1,7        | -20,4 | 0,9         | 0,072         |
| Davis Strait        | DS5        | 17          | 2,4         | 2,2        |       | 0,7         | 0,227         |
| Davis Strait        | DS5        | 19          | 2,5         | 2,2        |       | 1,0         | 0,252         |
| Davis Strait        | DS5        | 21,5        | 3,0         | 2,2        |       | 0,9         |               |
| Davis Strait        | DS5        | 24,5        | 2,5         | 1,9        | -21,5 | 2,1         | 0,285         |
| <b>Davis Strait</b> | <b>DS2</b> | <b>0,25</b> | <b>20,9</b> | <b>4,7</b> |       | <b>10,9</b> | <b>0,0084</b> |
| Davis Strait        | DS2        | 0,75        | 19,1        | 5,1        |       | 12,3        |               |
| Davis Strait        | DS2        | 1,25        | 19,8        | 5,0        |       | 11,8        |               |
| Davis Strait        | DS2        | 1,75        | 17,9        | 4,7        |       | 12,5        | 0,0111        |
| Davis Strait        | DS2        | 2,5         | 18,0        | 4,7        |       | 12,3        |               |
| Davis Strait        | DS2        | 3,5         | 17,1        | 4,5        |       | 12,3        |               |
| Davis Strait        | DS2        | 4,5         | 13,3        | 3,6        | -20,4 | 12,7        | 0,0164        |
| Davis Strait        | DS2        | 5,5         | 11,9        | 3,2        |       | 14,9        |               |
| Davis Strait        | DS2        | 6,5         | 10,5        | 3,1        |       | 12,5        |               |
| Davis Strait        | DS2        | 7,5         | 8,7         | 2,7        |       | 13,6        | 0,0105        |
| Davis Strait        | DS2        | 8,5         | 6,8         | 2,1        | -20,9 | 14,5        |               |
| Davis Strait        | DS2        | 9,5         | 9,4         | 2,1        |       | 14,9        | 0,0083        |
| Davis Strait        | DS2        | 11          | 8,1         | 1,9        | -22,1 | 14,9        |               |
| Davis Strait        | DS2        | 13          | 7,8         | 1,5        |       | 16,7        | 0,0073        |
| Davis Strait        | DS2        | 15          | 6,8         | 1,5        | -22,4 | 13,8        |               |
| Davis Strait        | DS2        | 17          | 4,5         | 1,2        |       | 16,6        |               |
| Davis Strait        | DS2        | 19          | 4,3         | 1,0        |       | 21,2        | 0,0152        |
| Davis Strait        | DS2        | 21,5        | 3,8         | 1,1        |       | 23,1        | 0,0144        |
| <b>Davis Strait</b> | <b>DS1</b> | <b>0,25</b> | <b>12,8</b> | <b>5,5</b> |       | <b>10,3</b> | <b>0,009</b>  |
| Davis Strait        | DS1        | 0,75        | 16,9        | 6,5        |       | 11,0        |               |
| Davis Strait        | DS1        | 1,25        | 17,4        | 6,5        |       | 12,6        |               |
| Davis Strait        | DS1        | 1,75        | 16,8        | 6,2        |       | 10,7        | 0,004         |
| Davis Strait        | DS1        | 2,5         | 16,7        | 5,2        |       | 8,1         |               |
| Davis Strait        | DS1        | 3,5         | 15,0        | 4,3        |       | 16,6        | 0,009         |
| Davis Strait        | DS1        | 4,5         | 11,1        | 4,1        |       | 15,2        |               |
| Davis Strait        | DS1        | 5,5         | 9,5         | 3,5        |       | 21,0        | 0,011         |
| Davis Strait        | DS1        | 6,5         | 8,7         | 3,4        |       | 19,1        |               |
| Davis Strait        | DS1        | 7,5         | 8,3         | 3,3        |       | 17,4        |               |
| Davis Strait        | DS1        | 8,5         | 6,7         | 3,1        | -20,9 | 18,1        |               |
| Davis Strait        | DS1        | 9,5         | 6,7         | 3,3        |       | 16,1        | 0,023         |
| Davis Strait        | DS1        | 11          | 7,5         | 2,6        |       | 22,7        |               |
| Davis Strait        | DS1        | 13          | 5,3         | 3,0        |       | 17,9        | 0,255         |
| Davis Strait        | DS1        | 15          | 5,2         | 2,3        |       | 27,4        | 0,270         |
| Davis Strait        | DS1        | 17          | 5,6         | 2,2        |       | 29,9        |               |
| Davis Strait        | DS1        | 19          | 4,9         | 1,5        |       | 32,3        | 0,189         |
| Davis Strait        | DS1        | 21,5        | 5,1         | 1,9        |       | 28,1        |               |
| Davis Strait        | DS1        | 24,5        | 4,9         | 1,5        |       | 38,8        | 0,435         |
| Davis Strait        | DS1        | 27,5        | 4,2         | 1,2        |       | 26,0        | 0,374         |

|              |     |      |     |     |      |       |
|--------------|-----|------|-----|-----|------|-------|
| Davis Strait | DS1 | 30,5 | 4,6 | 1,6 | 35,5 |       |
| Davis Strait | DS1 | 33,5 | 4,9 | 1,4 | 42,0 | 0,750 |
| Davis Strait | DS1 | 36,5 | 4,3 | 1,4 | 41,3 |       |
| Davis Strait | DS1 | 39,5 | 4,5 | 2,6 | 39,4 | 0,633 |

<sup>1</sup>S<sub>RED</sub> = Acid Volatile Sulphur + Chromium Reducible Sulphur

<sup>2</sup>Fe<sub>OX</sub> = Fe extracted with with a sodium dithionite solution (Fe oxyhydroxides)

cores

| Fe <sub>ox</sub> <sup>2</sup><br>(mg g <sup>-1</sup> ) | Al<br>(%)  |
|--------------------------------------------------------|------------|
| 7,1                                                    | 5,7        |
| 6,4                                                    | 5,2        |
| 4,9                                                    | 5,4        |
| 5,2                                                    | 5,4        |
| 4,8                                                    | 5,4        |
| 4,7                                                    | 5,7        |
| 4,7                                                    | 5,3        |
| 4,3                                                    | 5,4        |
| 4,1                                                    | 5,5        |
| 3,6                                                    | 5,4        |
| 3,7                                                    | 5,1        |
| 3,6                                                    | 5,4        |
| 4,8                                                    | 5,4        |
| 3,9                                                    | 5,5        |
| 3,9                                                    | 5,7        |
| 4,2                                                    | 5,4        |
| 3,5                                                    | 5,5        |
| 3,7                                                    | 5,6        |
| 3,0                                                    |            |
| 2,3                                                    | 5,4        |
| 2,0                                                    | 5,1        |
| 1,7                                                    | 5,1        |
| <b>7,0</b>                                             | <b>5,8</b> |
| 7,8                                                    | 6,1        |
| 7,1                                                    | 5,9        |
| 6,3                                                    | 5,1        |
| 5,8                                                    | 5,4        |
| 5,1                                                    | 5,8        |
| 4,2                                                    | 5,3        |
| 4,0                                                    | 5,8        |
| 3,9                                                    | 5,5        |
| 3,8                                                    | 5,6        |
| 3,9                                                    | 5,6        |
| 3,3                                                    | 5,3        |
| 2,8                                                    | 5,2        |
| 2,9                                                    | 5,4        |
| 2,9                                                    | 5,4        |
| 3,1                                                    | 5,5        |
| 2,8                                                    | 5,7        |
| 2,9                                                    | 5,7        |
| 2,9                                                    | 5,6        |

|            |            |
|------------|------------|
| 2,3        | 5,6        |
| 2,5        | 5,4        |
| <b>7,7</b> | <b>5,9</b> |
| 7,8        | 6,1        |
| 7,6        | 6,0        |
| 7,1        | 6,0        |
| 7,1        | 6,2        |
| 6,2        | 6,1        |
| 6,8        | 6,3        |
| 6,8        | 6,0        |
| 7,0        | 6,4        |
| 7,2        | 6,7        |
| 7,5        | 5,9        |
| 7,7        | 6,4        |
| 7,5        | 6,0        |
| 7,8        | 6,1        |
| 6,3        | 6,2        |
| 6,3        | 6,1        |
| 5,5        | 6,1        |
| 4,9        | 6,1        |
| 4,8        | 6,0        |
| 4,3        | 6,1        |
| 3,2        | 6,1        |
| 2,9        | 6,2        |
| <b>5,2</b> | <b>5,0</b> |
| 4,7        | 5,3        |
| 4,7        | 5,3        |
| 4,1        | 5,1        |
| 4,0        | 5,4        |
| 3,9        | 5,2        |
| 3,9        | 6,3        |
| 3,5        | 5,1        |
| 3,4        | 5,2        |
| 3,1        | 5,3        |
| 2,2        | 4,9        |
| <b>5,3</b> | <b>5,6</b> |
| 5,0        | 5,7        |
| 4,8        | 5,8        |
| 4,6        | 5,4        |
| 4,6        | 5,8        |
| 4,7        | 5,9        |
| 4,4        | 5,7        |
| 4,5        | 5,5        |
| 4,2        | 5,6        |
| 4,1        | 5,6        |
| 3,8        | 5,7        |
| 3,9        | 5,6        |

|             |            |
|-------------|------------|
| 3,6         | 5,8        |
| 3,4         | 5,7        |
| 3,3         | 5,6        |
| 2,5         | 5,8        |
| 2,4         | 5,8        |
| 2,1         | 5,7        |
| 1,4         | 5,4        |
| 1,1         | 5,9        |
| 1,2         | 6,1        |
| <b>7,6</b>  | <b>6,0</b> |
| 7,0         | 6,0        |
| 7,0         | 5,8        |
| 6,9         | 6,2        |
| 6,8         | 6,1        |
| 6,7         | 6,8        |
| 6,3         | 6,5        |
| 6,0         | 6,0        |
| 6,0         | 6,5        |
| 5,8         | 6,0        |
| 5,9         | 5,9        |
| 5,4         | 6,0        |
| 5,2         | 5,9        |
| 5,7         | 5,6        |
| 7,6         | 6,5        |
| 6,8         | 5,9        |
| 6,7         | 6,0        |
| 6,8         | 6,1        |
| 6,6         | 5,7        |
| 7,2         | 6,1        |
| 6,5         | 5,8        |
| 4,7         | 6,4        |
| 2,1         | 5,9        |
| 1,4         | 5,8        |
| <b>12,1</b> | <b>6,4</b> |
| 12,3        | 6,3        |
| 12,3        | 6,2        |
| 11,1        | 5,8        |
| 10,3        | 5,8        |
| 9,4         | 5,6        |
| 9,1         | 5,5        |
| 8,3         | 5,6        |
| 8,0         | 5,3        |
| 7,6         | 5,1        |
| 7,7         | 5,0        |
| 7,5         | 5,0        |
| 7,0         | 4,9        |
| 6,8         | 4,7        |

|             |            |
|-------------|------------|
| 7,4         | 4,9        |
| 6,6         | 4,4        |
| 6,1         | 4,6        |
| 6,4         | 4,6        |
| 5,6         | 4,9        |
| 5,1         | 5,0        |
| 4,9         | 4,7        |
| 5,0         | 3,9        |
| 5,0         | 4,7        |
| 5,1         | 4,9        |
| <b>11,5</b> | <b>5,7</b> |
| 12,0        | 5,7        |
| 13,9        | 5,6        |
| 13,0        | 5,8        |
| 9,5         | 4,2        |
| 7,5         | 4,1        |
| 6,6         | 4,6        |
| 7,8         | 5,0        |
| 7,5         | 5,4        |
|             | 5,6        |
| 6,9         | 5,5        |
| 6,7         | 5,5        |
| 6,7         | 5,3        |
| 6,7         | 5,8        |
| 7,5         | 5,8        |
| 6,6         | 5,9        |
| 6,5         | 5,2        |
| 5,6         | 5,2        |
| 6,6         | 5,2        |
| 9,4         | 6,7        |
| 8,1         | 6,7        |
| 4,3         | 7,0        |
| <b>14,2</b> | <b>7,2</b> |
| 14,3        | 7,1        |
| 14,2        | 7,0        |
| 12,7        | 6,8        |
| 12,3        | 6,4        |
| 11,3        | 6,2        |
| 12,5        | 6,1        |
| 17,0        | 6,7        |
| 21,3        | 6,5        |
| 16,7        | 6,8        |
| 13,4        | 6,9        |
| 13,0        | 6,6        |
| 11,8        | 6,8        |
| 10,6        | 6,5        |
| 10,3        | 6,7        |

|             |            |
|-------------|------------|
| 12,2        | 7,0        |
| 13,0        | 7,5        |
| 17,3        | 7,4        |
| 26,2        | 6,2        |
| 16,8        | 6,3        |
| 13,1        | 7,4        |
| 12,4        | 6,5        |
| 11,1        | 6,7        |
| 11,0        | 6,1        |
| 11,8        | 6,3        |
| 14,5        | 6,8        |
| 11,8        | 6,7        |
| <b>12,3</b> | <b>5,6</b> |
| 13,5        | 5,6        |
| 13,8        | 6,2        |
| 13,3        | 5,9        |
| 14,1        | 6,2        |
| 10,3        | 5,9        |
| 9,5         | 6,0        |
| 9,2         | 5,9        |
| 9,2         | 6,1        |
| 8,1         | 5,8        |
| 8,5         | 6,0        |
| 7,8         | 6,1        |
| 7,3         | 5,8        |
| 5,4         | 6,9        |
| 5,8         | 6,6        |
| 5,7         | 6,5        |
| 6,1         | 5,8        |
| 6,4         | 6,4        |
| 6,2         | 6,6        |
| 6,2         | 6,9        |
| 6,2         | 6,9        |
| 5,6         | 6,9        |
| 5,2         | 7,0        |
| 5,3         | 7,1        |
| 5,2         | 6,8        |
| <b>17,5</b> | <b>7,9</b> |
| 18,0        | 8,0        |
| 18,3        | 7,9        |
| 17,9        | 8,3        |
| 18,2        | 8,2        |
| 18,5        | 7,9        |
| 18,8        | 8,4        |
| 18,6        | 8,2        |
| 18,8        | 8,5        |
| 20,7        | 8,3        |

|             |            |
|-------------|------------|
| 19,7        | 8,4        |
| 26,8        | 8,1        |
| 33,5        | 8,0        |
| 33,1        | 7,8        |
| 8,2         | 8,5        |
| 9,9         | 8,4        |
| 4,1         | 8,7        |
| 4,5         | 8,5        |
| 7,4         | 8,7        |
| 8,6         | 7,9        |
| 10,3        | 8,5        |
| 11,1        | 8,5        |
| 11,2        | 8,3        |
| 13,0        | 8,1        |
| 12,9        | 7,3        |
| <b>18,3</b> | <b>8,5</b> |
| 19,2        | 8,7        |
| 18,7        | 8,7        |
| 18,7        | 8,4        |
| 18,8        | 8,6        |
| 18,8        | 8,9        |
| 19,5        | 8,4        |
| 19,1        | 8,5        |
| 19,2        | 9,0        |
| 19,3        | 9,0        |
| 19,1        | 9,4        |
| 18,9        | 8,9        |
| 22,0        | 8,5        |
| 32,0        | 8,5        |
| 24,3        | 9,1        |
| 17,1        | 8,6        |
| 14,1        | 9,1        |
| 20,6        | 9,0        |
| 16,9        | 9,0        |
| 15,4        | 8,9        |
| 21,6        | 8,6        |
| 14,5        | 8,9        |
| 18,6        | 8,8        |
| 20,6        | 9,1        |
| <b>7,90</b> | <b>6,1</b> |
| 8,73        | 6,2        |
| 9,08        | 6,2        |
| 12,00       | 6,3        |
| 13,85       | 6,2        |
| 12,30       | 6,3        |
| 10,91       | 6,3        |
| 8,97        | 6,5        |

|             |            |
|-------------|------------|
| 6,80        | 8,1        |
| 4,70        | 6,3        |
| 5,26        | 6,3        |
| 5,39        | 6,6        |
| 5,67        | 6,7        |
| 5,37        | 6,5        |
| 6,52        | 6,4        |
| 5,16        | 6,7        |
| 7,38        | 6,5        |
| 5,22        | 6,3        |
| <b>4,8</b>  | <b>4,1</b> |
| 4,9         | 4,4        |
| 5,4         | 4,2        |
| 5,1         | 4,4        |
| 5,3         | 4,5        |
| 5,3         | 4,3        |
| 5,0         | 4,7        |
| 5,1         | 4,5        |
| 4,5         | 4,4        |
| 4,9         | 4,4        |
| 4,1         | 4,5        |
| 3,5         | 4,4        |
| 3,1         | 4,3        |
| 2,9         | 4,2        |
| 2,7         | 4,0        |
| 2,6         | 3,8        |
| 2,3         | 3,7        |
| <b>12,3</b> | <b>4,6</b> |
| 12,7        | 4,6        |
| 13,9        | 4,6        |
| 15,2        | 4,7        |
| 16,2        | 4,6        |
| 12,8        | 4,7        |
| 7,4         | 4,6        |
| 5,1         | 4,7        |
| 4,2         | 4,7        |
| 3,5         | 4,7        |
| 3,1         | 4,8        |
| 3,0         | 4,7        |
| 2,7         | 4,7        |
| 2,5         | 4,7        |
| 2,7         | 4,7        |
| 2,7         | 4,7        |
| 3,1         | 4,7        |
| 3,7         | 4,7        |
| 3,8         | 4,8        |
| 3,4         | 4,6        |

|             |            |
|-------------|------------|
| 3,7         | 4,9        |
| 3,9         | 4,7        |
| 4,3         | 4,7        |
| 4,6         | 4,6        |
| <b>11,1</b> | <b>5,2</b> |
| 11,5        | 5,2        |
| 11,6        | 5,4        |
| 11,7        | 5,3        |
| 12,3        | 5,3        |
| 16,3        | 5,2        |
| 22,5        | 5,0        |
| 14,8        | 5,3        |
| 4,9         | 5,4        |
| 3,0         | 5,5        |
| 2,9         | 5,6        |
| 2,6         | 5,4        |
| 2,6         | 5,6        |
| 2,5         | 5,7        |
| 2,5         | 5,5        |
| 2,4         | 5,6        |
| 2,4         | 5,5        |
| 2,1         | 5,6        |
| 2,0         | 5,4        |
| 2,0         | 5,5        |
| 2,0         | 5,5        |
| 2,1         | 5,7        |
| 2,0         | 5,6        |
| 2,0         | 5,6        |
| <b>3,4</b>  | <b>4,4</b> |
| 3,7         | 4,6        |
| 3,7         | 4,6        |
| 3,7         | 4,6        |
| 3,5         | 4,7        |
| 3,8         | 4,5        |
| 3,9         | 4,5        |
| 3,8         | 4,6        |
| 4,2         | 4,8        |
| 4,6         | 4,4        |
| 4,6         | 4,4        |
| 3,2         | 4,2        |
| 2,8         | 4,5        |
| 2,8         | 4,4        |
| 2,5         | 4,5        |
| 2,9         | 4,6        |
| 3,2         | 4,5        |
| 3,3         | 4,6        |
| 2,8         | 4,6        |

|             |            |
|-------------|------------|
| 2,6         | 4,7        |
| 3,8         | 4,8        |
| 3,4         | 4,6        |
| 3,8         | 4,6        |
| 5,5         | 4,8        |
| 5,3         | 4,9        |
| 5,1         | 5,0        |
| 5,1         | 4,8        |
| <b>13,8</b> | <b>5,3</b> |
| 12,8        | 5,1        |
| 15,2        | 5,3        |
| 16,0        | 5,2        |
| 17,5        | 5,2        |
| 13,7        | 5,4        |
| 7,5         | 5,4        |
| 5,2         | 5,4        |
| 4,1         | 5,5        |
| 3,3         | 5,5        |
| 2,9         | 5,4        |
| 2,8         | 5,6        |
| 2,6         | 5,5        |
| 2,3         | 5,6        |
| 2,6         | 5,4        |
| 2,7         | 5,5        |
| 3,0         | 5,3        |
| 3,6         | 5,5        |
| 3,8         | 5,4        |
| 3,3         | 5,4        |
| 3,6         | 5,3        |
| 3,8         | 5,4        |
| 4,4         | 5,1        |
| 4,6         | 5,4        |
| 3,6         | 5,4        |
| 2,6         | 5,4        |
| <b>1,8</b>  | <b>2,8</b> |
| 1,4         | 2,7        |
| 0,8         | 2,5        |
| 0,9         | 2,8        |
| 0,9         | 3,1        |
| 0,9         | 3,2        |
| 0,9         | 3,0        |
| <b>6,4</b>  | <b>4,7</b> |
| 5,9         | 5,3        |
| 6,8         | 5,2        |
| 6,6         | 5,1        |
| 7,1         | 5,6        |
| 6,3         | 5,1        |

|             |            |
|-------------|------------|
| 4,7         | 5,1        |
| 4,0         | 5,2        |
| 4,5         | 5,7        |
| 4,1         | 5,3        |
| 3,5         | 5,1        |
| 2,9         | 5,2        |
| 2,9         | 6,0        |
| 2,7         | 5,5        |
| 2,8         | 5,3        |
| 2,6         | 5,1        |
| 2,1         | 5,3        |
| <b>18,4</b> | <b>6,0</b> |
| 20,5        | 6,2        |
| 20,5        | 6,2        |
| 19,2        | 6,2        |
| 13,4        | 6,2        |
| 8,9         | 6,6        |
| 7,1         | 6,8        |
| 5,9         | 7,0        |
| 4,6         | 6,8        |
| 4,2         | 7,4        |
| 4,3         | 7,4        |
| 4,0         | 6,9        |
| 3,9         | 7,0        |
| 3,7         | 7,8        |
| 4,0         | 6,9        |
| 3,4         | 7,3        |
| 3,3         | 6,9        |
| 3,3         | 6,9        |
| 3,0         | 6,8        |
| 3,1         | 7,3        |
| 2,4         | 7,0        |
| 2,3         | 6,9        |
| 2,1         | 6,5        |
| 1,9         | 6,6        |
| 1,8         | 6,5        |
| 1,6         | 6,5        |
| <b>1,0</b>  | <b>6,8</b> |
| 1,2         | 7,1        |
| 1,0         | 6,9        |
| 0,7         | 6,6        |
| 0,5         | 6,6        |
| 0,5         | 6,8        |
| 0,3         | 6,8        |
| 0,2         | 6,7        |
| 0,2         | 6,8        |
| 0,1         | 6,7        |

|            |            |
|------------|------------|
| 0,1        | 6,8        |
| 0,1        | 8,2        |
| 0,1        | 7,1        |
| 0,1        | 6,8        |
| 0,1        | 6,8        |
| 0,1        | 6,7        |
| 0,2        | 6,9        |
| 0,2        | 7,1        |
| 0,3        | 7,6        |
| <b>6,5</b> | <b>5,6</b> |
| 6,4        | 5,6        |
| 6,4        | 5,7        |
| 5,9        | 5,9        |
| 6,3        | 5,9        |
| 6,7        | 5,9        |
| 6,1        | 5,7        |
| 6,8        | 6,2        |
| 5,7        | 6,0        |
| 4,9        | 5,4        |
| 3,7        | 5,5        |
| 4,4        | 5,4        |
| 3,7        | 5,5        |
| 3,3        | 5,6        |
| 3,0        | 5,8        |
| 2,6        | 5,6        |
| 1,7        | 5,1        |
| 1,8        | 5,6        |
| <b>2,0</b> | <b>5,2</b> |
| 2,7        | 5,4        |
| 2,9        | 5,9        |
| 2,6        | 5,9        |
| 2,8        | 5,9        |
| 2,1        | 5,8        |
| 3,0        | 5,5        |
| 1,3        | 5,4        |
| 1,2        | 5,4        |
| 1,2        | 5,4        |
| 1,0        | 5,1        |
| 0,9        | 5,2        |
| 0,9        | 5,3        |
| 0,9        | 4,9        |
| 1,0        | 4,6        |
| 1,1        | 4,7        |
| 1,0        | 4,9        |
| 1,4        | 4,7        |
| 0,9        | 4,8        |
| 1,1        | 4,6        |

|     |     |
|-----|-----|
| 1,5 | 4,6 |
| 1,3 | 4,6 |
| 1,6 | 4,5 |
| 1,2 | 4,7 |

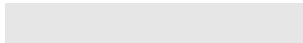

Supplement: Supplementary file 1 [file 7ff9af65c630b601ede16db9.pdf]
